# Supplementary material for: Marangoni-driven spreading of miscible liquids in the binary pendant drop geometry
Source: Royal Society of Chemistry journal article supplement (doi:10.1039/c8sm02074d), 2019-01-01
Supplement: c8sm02074d1.pdf [file c8sm02074d1.pdf]

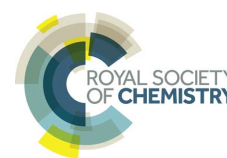

Journal Name

ARTICLE TYPE

Cite this: DOI: 10.1039/xxxxxxxxxx

# Marangoni-driven spreading of miscible liquids in the binary pendant drop geometry

Robin B. J. Koldeweij<sup>‡ab</sup>, Bram F. van Capelleveen<sup>‡a</sup>, Detlef Lohse<sup>ac</sup> and Claas Willem Visser<sup>†ad</sup>

## Supplementary material

### 0.1 Range of control parameters

|       | drop 1                                  |                     | drop 2                                  |                     | drops                    |
|-------|-----------------------------------------|---------------------|-----------------------------------------|---------------------|--------------------------|
|       | Surface tension<br>(mNm <sup>-1</sup> ) | Viscosity<br>(mPas) | Surface tension<br>(mNm <sup>-1</sup> ) | Viscosity<br>(mPas) | Initial diameter<br>(mm) |
| Range | 46.2 to 72.8                            | 1 to 100            | 22.9 to 46.2                            | 1 to 100            | 2.00 to 2.92             |
| Error | 5%                                      | 2%                  | 5%                                      | 2%                  | 0.1%                     |

**Table 1** Range of the material parameters. The properties of ink-containing liquids were measured as described below; literature values were taken for the other liquids <sup>1–4</sup>.

<sup>a</sup> Physics of Fluids Group & Max Planck Center Twente for Complex Fluid Dynamics, Department of Science and Technology, J. M. Burgers Center for Fluid Dynamics, University of Twente, 7500 AE Enschede, The Netherlands

<sup>b</sup> Equipment for Additive Manufacturing, TNO, 5612 AP Eindhoven, The Netherlands

<sup>c</sup> Max Planck Institute for Dynamics and Self-Organization, 37077 Göttingen, Germany

<sup>d</sup> Engineering Fluid Dynamics group, Department of Thermal and Fluid Engineering, Faculty of Engineering Technology, University of Twente, 7500 AE Enschede, The Netherlands

<sup>‡</sup> These authors contributed equally to this work

<sup>†</sup> Corresponding author: c.visser@utwente.nl

## 0.2 Surface tension measurements

Surface tension was measured in triplo, using a pendant drop system (Data Physics OCA 15EC). The surface tension as a function of the ethanol percentage is shown in figure 1; the dependency of the surface tension on the glycerol percentage is shown in figure 2, and the time-insensitivity of the surface tension is shown in figure 3.

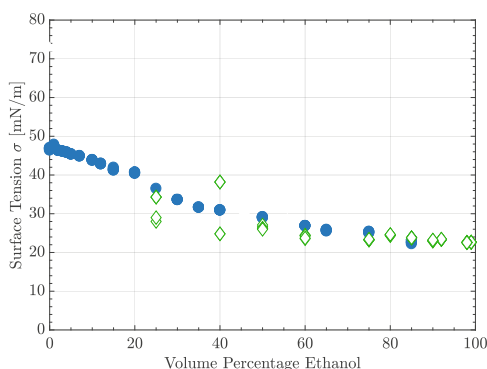

**Fig. 1** (Color online) Surface tension of the water-ink-ethanol mixture as a function of the vol% of ethanol (●). 15 vol% ink (Brother LC-800) was dissolved. Literature values of water-ethanol mixtures without ink are from<sup>2</sup> (◇).

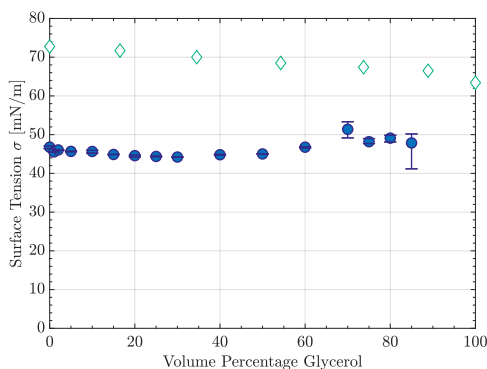

**Fig. 2** (Color online) Surface tension of the water glycerol mixture, depending on the vol% of glycerol. For the values used in the paper (●) 15 vol% ink (Brother LC-800) was solved in the glycerol. Water-glycerol values are taken from Takamura *et al.*<sup>4</sup> (◇).

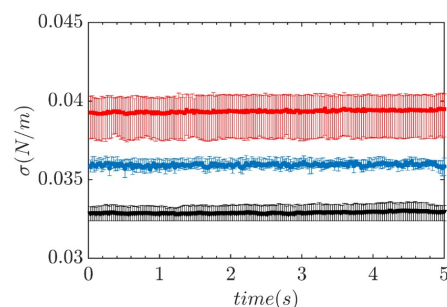

**Fig. 3** (Color online) Surface tension of various mixtures as a function of time. 15% ink, 10% ethanol and 75% water (red), 100% ink (blue), 15% ink and 85% ethanol (black).

## 0.3 Viscosity measurements

Viscosity data was obtained using a rheometer (Anton Paar MCR 502), or from the literature, when indicated.

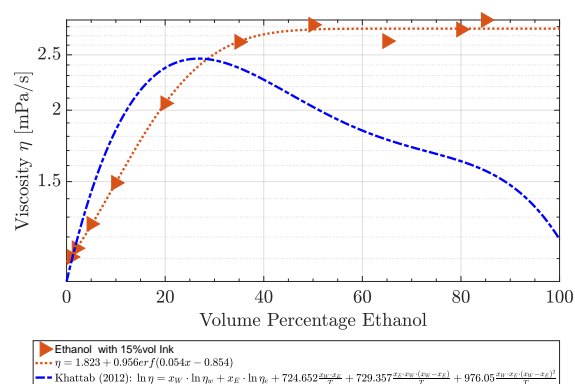

**Fig. 4** (Color online) Viscosity of the water ethanol mixture, depending on the vol% of ethanol. Measurements (▴) and data fit (---). 15 vol% ink (Brother LC-800) was solved in the ethanol. Water-ethanol mixtures from ref.<sup>3</sup> are shown by the blue line (- - -).

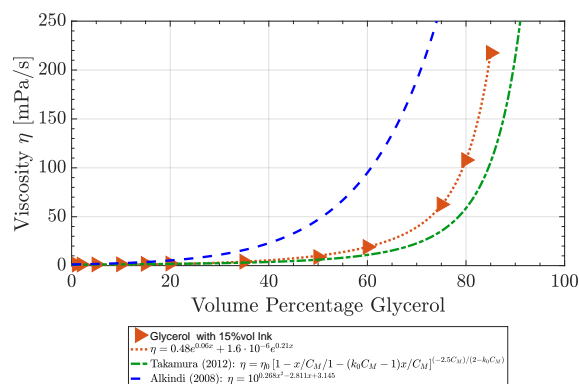

**Fig. 5** (Color online) Viscosity of the water-glycerol mixture as a function of the vol% of glycerol. Measurements (▶) and data fit (---). 15 vol% ink (Brother LC-800) was solved in the glycerol mixture. Previously determined values for water-glycerol mixtures are from<sup>4</sup> (-·-·-) and<sup>2</sup>(- - -).

#### 0.4 Optical penetration depth

To determine the spreading rate, a threshold value for absorbed light has been chosen in the analysis. The transmission of light versus the optical penetration depth for the ink solutions are measured using a UV-VIS spectrometer (DR5000, Hach Lange), with pure air and a cuvette with water as references. The results are shown in figure 6. For 5 vol% ink a range of transmission has been chosen between  $0.025 < I/I_0 < 0.1$ , corresponding to optical penetration depths of 51 μm to 78 μm. The effect of the total transmittance threshold on the measurements of  $L(t)$  is shown in figure 7. Increasing the transmittance leads to slightly lower penetration depth, therefore showing faster spreading. The effects in the ranges studied show the same exponents,  $\alpha = 0.77$ , and prefactors,  $0.45\beta$ , for penetration depths of 63 μm and 78 μm. For the smaller penetration depth of 51 μm, the prefactor increases to 0.51.

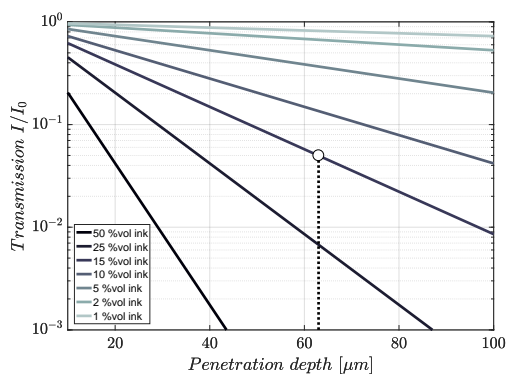

**Fig. 6** (Color online) Optical transmittance of ink (Brother LC-800) in water solutions versus the penetration depth. 5% transmittance was chosen as the experimental threshold, corresponding to a penetration depth of 63 μm shown by the symbol (○).

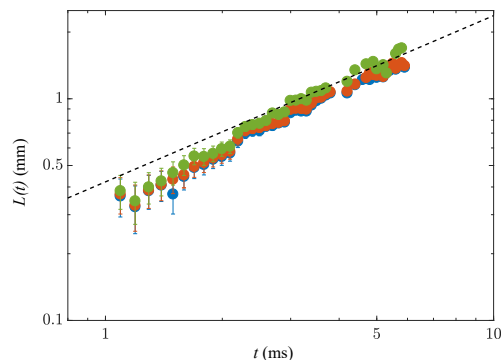

**Fig. 7** (Color online) Effect of the threshold value on the measured spreading distance,  $\eta_1 \approx \eta_2 \approx 1.5$  mPa s,  $\Delta\sigma = 32$  mN m<sup>-1</sup>. Optical penetration depths are 78 μm (●), 63 μm (●), and 51 μm (●). The dashed line (---) indicates  $L(t) = 0.5\beta t^{0.77}$ ,  $\beta = \Delta\sigma^{1/2}(\rho_1\eta_1)^{-1/4}$ .

#### 0.5 Boundary layer thickness

The transition from the deep-bath regime to the thin-film regime can be expected as soon as a backflow will limit the development of the boundary layer in drop 1. To first approximation, the viscous boundary layer cannot grow any further when  $\delta_{BL} > D/4$ , as shown in Figure 8. The Blasius boundary layer thickness is described by  $\delta_{BL} = (\eta t / \rho)^{1/2}$ , as shown in figure 9b. Only for experiments with a highly viscous inner drop ( $\eta_1 > 40$  mPa s), the

boundary layer reaches  $D/4$  as shown in Figure 9b. Indeed, in that case we observe a flattening of the spreading curve (Figure 9a) that is consistent with  $\alpha = 1/2$  as expected for thin-film spreading<sup>5</sup>.

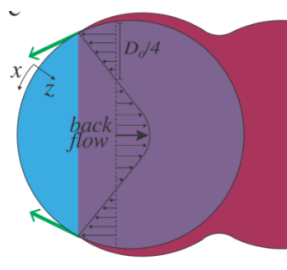

**Fig. 8** (Color online) Optical transmittance of ink (Brother LC-800) in water solutions versus the penetration depth. 5% transmittance was chosen as the experimental threshold, corresponding to a penetration depth of  $63\mu\text{m}$  shown by the symbol (o).

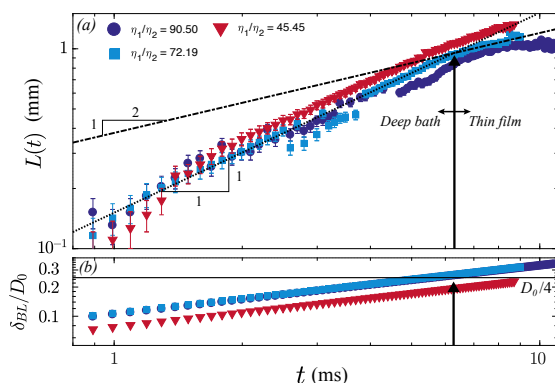

**Fig. 9** (Color online) Temporal transition in spreading regimes; (a) Spreading versus time for data with large  $\eta_1/\eta_2$ . Initial spreading scales as  $L(t) \sim t^\alpha$  with  $\alpha = 1$ . Later in time, a transition to  $\alpha = 0.5$  is visible. Both slopes are given by the dashed-dotted (1/2) and dotted line (1); (b) Corresponding growth of relative boundary layer  $\delta_{BL}/D_0$ . Transition to  $\alpha = 0.5$  occurs around  $\delta_{BL}/D_0 = D_0/4$ , suggesting thin film-limited spreading when the boundary layer interacts with the toroidal vortices.

## Notes and references

- 1 G. Vazquez, E. Alvarez and J. M. Navaza, *J. Chem. Eng. Data*, 1995, **40**, 611–614.
- 2 A. S. Alkindi, Y. M. Al-Wahaibi and A. H. Muggeridge, *J. Chem. Eng. Data*, 2008, **53**, 2793–2796.

- 3 I. S. Khattab, F. Bandarkar, M. A. A. Fakhree and A. Jouyban, *Korean J. Chem. Eng.*, 2012, **29**, 812–817.
- 4 K. Takamura, H. Fischer and N. R. Morrow, *J. Pet. Sci. Eng.*, 2012, **98-99**, 50–60.
- 5 S. Berg, *Physics of Fluids*, 2009, **21**, 1–12.
